# Supplementary material
Source: publisher site journal article supplement (https://www.spandidos-publications.com/1637/downloadSupplementary)
Supplement: Supplementary file 1 [file downloadSupplementary]

## Sheet: Table S1. Clinical information.
Table SI. Clinical information.
	Age	Sex	Pathological stage T	Lymph node metastasis	Distant metastasis	Tumor stage	Histological grade	OS Time	OS status	DFS Time	DFS status
TCGA-BR-8680-01	45	1	1	1	1	1	0	31.93	0	31.93	0
TCGA-BR-8296-01	58	0	1	1	0	1	1	15.57	1	12.81	1
TCGA-VQ-A91D-01	70	1	1	1	0	1	0	11.7	1	11.53	1
TCGA-HU-A4GQ-01	71	1	1	1	0	1	0	0.1	1	NA	NA
TCGA-VQ-A91S-01	63	1	1	1	0	1	NA	32.85	0	32.85	0
TCGA-BR-8686-01	69	1	1	1	0	1	1	20.86	1	NA	NA
TCGA-BR-8077-01	58	0	1	1	0	1	0	0.69	0	0.69	0
TCGA-VQ-A8PT-01	65	1	1	0	0	1	1	29.57	0	29.57	0
TCGA-VQ-A91E-01	67	0	1	0	0	1	1	21.81	0	21.81	0
TCGA-R5-A7ZF-01	65	0	1	1	1	1	0	8.51	1	NA	NA
TCGA-VQ-A91Y-01	67	1	1	1	0	1	1	9.72	1	8.48	1
TCGA-HU-8243-01	66	1	1	1	0	1	0	5.91	1	4.34	1
TCGA-HF-A5NB-01	75	0	1	1	0	1	1	30.49	0	30.49	0
TCGA-BR-8284-01	72	0	1	1	0	1	1	8.05	1	NA	NA
TCGA-BR-8285-01	57	0	1	1	0	1	1	0.56	1	NA	NA
TCGA-ZQ-A9CR-01	79	0	1	1	NA	1	1	0.79	1	NA	NA
TCGA-VQ-A94O-01	74	1	1	1	0	1	0	21.02	1	6.08	1
TCGA-VQ-AA68-01	52	0	1	1	0	1	0	43.63	0	43.63	0
TCGA-VQ-AA6J-01	75	1	1	1	0	1	1	27.53	0	27.53	0
TCGA-BR-8683-01	75	1	1	1	0	1	1	9.86	1	NA	NA
TCGA-BR-7959-01	59	1	1	1	0	1	1	33.18	0	33.18	0
TCGA-BR-A4J5-01	56	1	1	1	0	1	1	28.32	0	28.32	0
TCGA-BR-A452-01	57	1	1	1	0	1	1	7.52	1	NA	NA
TCGA-VQ-A8PU-01	72	0	1	1	0	1	1	27.33	1	NA	NA
TCGA-BR-8373-01	65	0	1	1	0	1	0	14.78	0	14.78	0
TCGA-VQ-A8P2-01	68	1	1	1	0	1	0	38.11	0	38.11	0
TCGA-VQ-AA6D-01	52	0	1	1	0	1	0	17.12	0	17.12	0
TCGA-BR-A4J7-01	49	1	1	NA	0	1	1	32.49	0	32.49	0
TCGA-B7-A5TJ-01	74	1	1	NA	0	1	0	11.01	0	11.01	0
TCGA-BR-8682-01	52	1	1	0	0	1	1	32.56	0	32.56	0
TCGA-BR-7851-01	74	1	1	0	0	1	1	NA	1	NA	NA
TCGA-VQ-A8P8-01	72	0	1	0	0	1	0	30.95	0	30.95	0
TCGA-VQ-A94R-01	63	1	1	1	0	NA	0	42.51	1	33.44	1
TCGA-BR-8289-01	57	1	1	1	1	1	1	2.66	1	NA	NA
TCGA-VQ-A91N-01	59	0	1	1	0	1	0	18.73	1	14.39	1
TCGA-VQ-A8PJ-01	53	1	1	1	1	1	NA	2.69	1	NA	NA
TCGA-CG-4438-01	56	1	1	1	0	1	1	54.04	0	54.04	0
TCGA-CG-5721-01	58	1	1	1	0	1	1	6.01	0	6.01	0
TCGA-CG-4460-01	66	0	1	1	1	1	0	21.98	1	16	1
TCGA-VQ-A8PQ-01	50	0	1	1	1	1	0	15.64	1	2.99	1
TCGA-VQ-A8PP-01	76	1	1	1	0	1	0	23.39	1	16.49	1
TCGA-VQ-A922-01	70	1	1	1	0	1	0	9.03	1	8.28	1
TCGA-CD-8529-01	65	1	1	0	1	1	0	12.29	0	12.29	0
TCGA-CG-5719-01	54	0	1	0	1	1	0	1.02	0	1.02	0
TCGA-BR-8080-01	72	0	1	1	0	1	1	9.59	1	NA	NA
TCGA-VQ-AA6A-01	56	1	1	1	0	1	0	38.9	0	38.9	0
TCGA-VQ-A8P3-01	72	1	1	1	0	1	0	37.19	0	37.19	0
TCGA-B7-A5TK-01	51	1	1	NA	0	1	1	9.46	0	9.46	0
TCGA-BR-8059-01	72	1	1	1	0	1	1	14.42	1	NA	NA
TCGA-BR-7957-01	50	0	1	1	1	1	NA	9.07	1	NA	NA
TCGA-RD-A7BT-01	66	1	1	1	0	1	1	8.61	1	4.04	1
TCGA-VQ-A91Q-01	61	1	1	1	0	1	1	20.8	1	18.1	1
TCGA-CG-4440-01	68	0	1	1	1	1	1	4.01	1	NA	NA
TCGA-CG-4469-01	70	1	1	1	0	1	1	7.06	1	NA	NA
TCGA-VQ-A928-01	49	1	1	1	0	1	0	5.72	1	4.86	1
TCGA-CG-5722-01	67	0	1	1	1	1	1	0.99	0	0.99	0
TCGA-VQ-A8E7-01	59	1	1	1	1	1	0	37.39	0	34.43	1
TCGA-R5-A7O7-01	51	1	1	1	1	1	0	45.63	0	45.63	0
TCGA-F1-A448-01	70	1	1	1	0	1	1	21.25	0	21.25	0
TCGA-VQ-A8PF-01	76	1	1	1	0	1	1	2.5	1	NA	NA
TCGA-HU-A4H2-01	58	0	1	1	0	1	0	12.94	0	12.94	0
TCGA-D7-8576-01	54	0	1	1	0	1	1	14.65	1	6.7	1
TCGA-VQ-A8DT-01	43	1	1	1	0	1	1	48.75	0	45.2	1
TCGA-VQ-A8PE-01	78	1	1	1	0	1	1	22.17	1	8.71	1
TCGA-BR-8676-01	59	1	1	1	0	1	1	7.52	0	7.52	0
TCGA-D7-8570-01	44	1	1	1	0	1	1	24.7	0	24.7	0
TCGA-D7-A4YU-01	73	1	1	1	0	1	1	16.43	0	16.43	0
TCGA-D7-A6EY-01	72	0	1	1	0	1	1	11.43	1	NA	NA
TCGA-D7-A6ET-01	76	1	1	1	0	1	0	26.41	0	25.53	1
TCGA-VQ-A8PK-01	58	1	1	1	0	1	0	17.84	1	8.64	1
TCGA-VQ-A91A-01	67	1	1	1	0	1	0	39.42	0	4.24	1
TCGA-VQ-AA6I-01	68	1	1	1	0	1	1	16.13	1	15.6	1
TCGA-VQ-A8PH-01	62	1	1	1	0	1	0	12.78	1	12.39	1
TCGA-RD-A8MW-01	72	1	1	1	0	1	1	37.88	1	3.22	1
TCGA-RD-A8MV-01	56	1	1	1	0	1	1	122.21	0	122.21	0
TCGA-R5-A805-01	71	1	1	1	0	1	1	9.23	1	NA	NA
TCGA-VQ-A91X-01	74	1	1	1	0	1	1	9.49	1	NA	NA
TCGA-VQ-A8E2-01	57	1	1	1	0	1	0	43.33	0	43.33	0
TCGA-VQ-AA6B-01	48	1	1	1	0	1	0	32.92	0	32.92	0
TCGA-VQ-A8PY-01	47	0	1	1	0	1	0	14.32	1	NA	NA
TCGA-VQ-AA64-01	68	1	1	1	0	1	0	18.4	1	NA	NA
TCGA-D7-8575-01	75	1	1	1	0	1	1	18.2	1	14.03	1
TCGA-VQ-A8E0-01	68	1	1	1	0	1	1	18.46	1	17.44	1
TCGA-D7-5578-01	80	1	1	1	0	1	1	12.65	0	12.65	0
TCGA-D7-5579-01	74	1	1	1	0	1	1	20.89	0	20.89	0
TCGA-D7-A6EX-01	72	0	1	1	0	1	1	11.3	0	11.3	0
TCGA-KB-A6F5-01	73	1	1	1	0	1	1	5.55	0	5.55	0
TCGA-MX-A5UJ-01	86	0	1	1	0	1	1	19.71	0	19.71	0
TCGA-D7-A6EZ-01	66	1	1	1	0	1	1	20.3	1	NA	NA
TCGA-VQ-A8DU-01	63	1	1	1	0	1	0	5.45	1	5.19	1
TCGA-VQ-A91V-01	58	1	1	1	0	1	0	42.61	0	38.9	1
TCGA-FP-8631-01	68	1	1	1	NA	1	0	0.56	0	0.56	0
TCGA-BR-8483-01	59	1	1	1	0	1	0	5.39	0	5.39	0
TCGA-D7-6526-01	67	0	1	1	0	1	0	17.18	0	17.18	0
TCGA-D7-A74A-01	61	0	1	1	0	1	0	19.94	0	19.94	0
TCGA-HU-8249-01	76	1	1	1	0	1	0	28.94	0	28.94	0
TCGA-HU-A4H6-01	72	0	1	1	0	1	0	21.16	0	21.16	0
TCGA-HU-A4HD-01	73	1	1	1	0	1	0	33.38	0	33.38	0
TCGA-SW-A7EB-01	45	1	1	1	0	1	0	5.78	0	5.78	0
TCGA-VQ-AA69-01	35	1	1	1	0	1	0	28.38	0	28.38	0
TCGA-R5-A7ZE-01	66	0	1	1	0	1	0	18.2	1	NA	NA
TCGA-VQ-A925-01	66	1	1	1	0	1	0	4.53	1	NA	NA
TCGA-CD-8525-01	82	0	1	1	0	1	1	12.58	0	12.58	0
TCGA-CD-8526-01	73	0	1	1	0	1	1	12.52	0	12.52	0
TCGA-CG-5734-01	68	1	1	1	0	1	1	7.98	1	NA	NA
TCGA-VQ-A923-01	90	1	1	1	0	1	1	2	1	NA	NA
TCGA-VQ-A8PS-01	76	1	1	1	0	1	0	13.34	1	4.3	1
TCGA-VQ-A91Z-01	67	0	1	1	0	1	0	55.52	0	43.04	1
TCGA-VQ-A91K-01	69	1	1	1	0	1	0	61.17	0	61.17	0
TCGA-VQ-A91W-01	30	1	1	1	0	1	0	60.81	0	60.81	0
TCGA-RD-A8N5-01	78	1	1	1	0	1	0	57.39	1	NA	NA
TCGA-VQ-A91U-01	78	1	1	1	0	1	0	1.71	1	NA	NA
TCGA-R5-A7ZR-01	70	0	1	NA	0	1	0	6.08	1	NA	NA
TCGA-HU-A4GD-01	56	1	1	1	0	1	1	22.73	0	13.11	1
TCGA-EQ-8122-01	71	0	1	1	NA	1	1	7.98	1	NA	NA
TCGA-D7-A4YV-01	69	0	1	1	0	1	1	5.91	1	NA	NA
TCGA-VQ-AA6F-01	57	1	1	1	0	1	0	54.07	0	17.94	1
TCGA-FP-7829-01	69	1	1	1	0	1	0	19.51	0	19.51	0
TCGA-KB-A93H-01	79	0	1	1	0	1	0	37.61	0	37.61	0
TCGA-VQ-A8E3-01	79	1	1	0	0	1	1	21.71	1	17.67	1
TCGA-D7-8573-01	57	1	1	0	0	1	1	19.48	0	19.48	0
TCGA-HU-8245-01	72	1	1	0	0	1	1	18.13	0	18.13	0
TCGA-HU-A4GT-01	71	0	1	0	0	1	1	6.5	0	6.5	0
TCGA-VQ-A8P5-01	67	1	1	0	0	1	1	7.72	1	NA	NA
TCGA-F1-A72C-01	68	1	1	0	0	1	0	11.37	0	11.27	1
TCGA-VQ-AA6G-01	68	1	1	0	0	1	0	26.02	1	15.41	1
TCGA-BR-8360-01	66	1	1	0	0	1	0	6.18	0	6.18	0
TCGA-HU-8604-01	82	0	1	0	0	1	0	22.8	0	22.8	0
TCGA-HU-A4GF-01	69	1	1	0	0	1	0	25.79	0	25.79	0
TCGA-VQ-A8DL-01	69	0	1	0	0	1	0	0.92	1	NA	NA
TCGA-CD-5813-01	60	1	1	0	0	1	1	12.39	1	10.35	1
TCGA-CD-8524-01	61	0	1	0	0	1	1	12.75	0	2.27	1
TCGA-BR-7704-01	69	0	1	0	0	1	1	35.22	0	35.22	0
TCGA-CG-5727-01	66	1	1	0	0	1	1	79.01	0	79.01	0
TCGA-CD-5798-01	82	1	1	0	0	1	0	13.4	0	13.4	0
TCGA-VQ-A8PB-01	65	0	1	0	0	1	0	34.26	1	NA	NA
TCGA-VQ-A924-01	69	1	1	0	0	1	0	55.39	1	NA	NA
TCGA-CD-5800-01	51	0	1	0	0	1	0	13.14	0	13.14	0
TCGA-HU-8238-01	56	1	1	NA	0	NA	0	1.51	0	1.51	0
TCGA-HF-7133-01	NA	0	0	1	0	1	0	63.01	0	63.01	0
TCGA-D7-6817-01	63	1	0	1	0	1	1	12.78	0	12.78	0
TCGA-D7-6520-01	53	1	0	1	0	1	1	18.82	0	1.51	1
TCGA-CG-4455-01	72	1	0	1	0	1	1	12.02	0	12.02	0
TCGA-HF-7132-01	NA	1	0	1	0	1	0	77.23	0	77.23	0
TCGA-CG-5718-01	78	0	0	1	0	1	0	35.97	1	NA	NA
TCGA-VQ-A92D-01	67	1	0	0	0	0	0	66.75	0	66.75	0
TCGA-CG-4477-01	58	0	0	0	0	0	1	30.95	0	11.99	1
TCGA-CG-4466-01	81	0	0	0	0	0	0	18.96	0	18.96	0
TCGA-BR-4294-01	65	1	0	NA	0	NA	0	0	0	0	0
TCGA-CG-5732-01	66	1	0	1	0	1	0	68.99	1	64.03	1
TCGA-CG-5730-01	80	0	0	1	1	1	0	4.01	0	4.01	0
TCGA-D7-A4YT-01	56	1	0	1	0	1	0	14.26	0	14.26	0
TCGA-D7-5577-01	53	0	0	1	0	1	0	25.69	1	12.35	1
TCGA-CG-5733-01	83	0	0	1	0	1	1	21.06	1	14.03	1
TCGA-RD-A8N6-01	78	0	0	1	0	1	1	8.94	1	5.35	1
TCGA-CG-4441-01	83	1	0	1	0	1	0	13.99	1	NA	NA
TCGA-D7-A4Z0-01	60	0	0	1	0	1	1	14.75	0	14.75	0
TCGA-HU-A4H4-01	53	0	0	1	0	1	1	23.82	0	23.82	0
TCGA-D7-6815-01	70	0	0	1	0	1	0	15.97	0	15.97	0
TCGA-D7-8579-01	66	0	0	1	0	1	0	20.89	0	20.89	0
TCGA-HU-A4G3-01	54	1	0	1	0	1	0	5.58	0	5.58	0
TCGA-D7-6820-01	64	1	0	1	0	1	0	11.3	0	11.3	0
TCGA-HU-A4GN-01	61	1	0	1	0	1	0	29.96	0	5.52	1
TCGA-CD-5799-01	45	1	0	1	0	1	1	13.01	0	13.01	0
TCGA-CD-8527-01	72	0	0	1	0	1	0	7.16	1	5.22	1
TCGA-CG-4449-01	81	1	0	1	0	1	0	19.05	0	11.04	1
TCGA-D7-6527-01	62	1	0	1	0	1	0	10.25	1	2.46	1
TCGA-CG-4437-01	83	1	0	1	0	1	0	8.05	0	8.05	0
TCGA-HU-A4H5-01	71	1	0	0	0	0	NA	23.78	0	23.78	0
TCGA-CG-4442-01	85	1	0	0	0	0	1	0	0	0	0
TCGA-CG-5728-01	88	0	0	0	0	0	1	65.05	0	65.05	0
TCGA-D7-A6F0-01	79	0	0	0	0	0	1	22.27	0	22.27	0
TCGA-D7-A6F2-01	62	1	0	0	0	0	1	15.64	0	15.64	0
TCGA-F1-6874-01	79	1	0	0	0	0	1	14.45	0	14.45	0
TCGA-VQ-A8DV-01	48	1	0	0	0	0	0	13.24	1	9.46	1
TCGA-ZA-A8F6-01	71	1	0	0	NA	0	0	17.25	0	17.25	0
TCGA-CG-4436-01	57	1	0	0	0	0	0	7.98	0	7.98	0
TCGA-D7-6528-01	70	0	0	0	0	0	0	15.21	0	15.21	0
TCGA-D7-6822-01	77	1	0	0	0	0	0	12.32	0	12.32	0
TCGA-HU-A4H8-01	77	1	0	1	0	0	0	14.06	0	11.63	1
TCGA-HU-A4G6-01	74	1	0	0	0	0	1	24.24	0	24.24	0
TCGA-BR-7703-01	81	1	0	0	0	0	0	36.14	0	36.14	0
TCGA-HU-8610-01	75	1	0	0	0	0	0	0.76	0	0.76	0
TCGA-HU-A4GH-01	75	1	0	0	0	0	0	11.76	0	11.76	0
TCGA-HU-A4G9-01	67	0	0	0	0	0	0	24.18	0	24.18	0
TCGA-HU-8244-01	77	0	0	0	0	0	0	24.38	0	24.38	0
TCGA-KB-A6F7-01	54	0	0	1	0	0	1	63.57	0	63.57	0
TCGA-CG-4443-01	68	1	0	0	0	0	0	29.96	0	29.96	0
TCGA-VQ-A8PX-01	51	1	0	0	0	0	0	64.52	0	64.52	0
TCGA-HF-7134-01	NA	1	0	0	0	0	0	52.17	0	52.17	0
TCGA-CG-5726-01	73	1	0	0	0	0	0	28.94	1	NA	NA
